# Supplementary material
Source: Springer Nature journal article supplement (https://www.springermedizin.de/resource/supplementary/12879_2011_1741_MOESM2_ESM.pdf/9443728)
Supplement: MOESM2 [file 9443728]

Prevalence survey in 2003  
11,624 people  
317 CXR films suspected of TB

(22 active TB cases by sputum  
smear/culture in 2003)

(1 active TB case by sputum  
smear in 2004)

59 missing films

258 CXR films  
(read by 2 Japanese and 2 Vietnamese  
raters, using 2 coding systems)

The follow-up survey in 2006:  
93 CXR films  
(read by 1 Japanese and 1 Vietnamese  
raters, using 2 coding systems)

(1 active TB case by sputum  
smear in 2006)

**2,436 readings in total**
